# Supplementary material
Source: Research Square preprint supplement (doi:10.21203/rs.3.rs-9404268/v1)
Supplement: Supplementary file 1 [file 6b397fc14dfc22475bd2390a.docx]

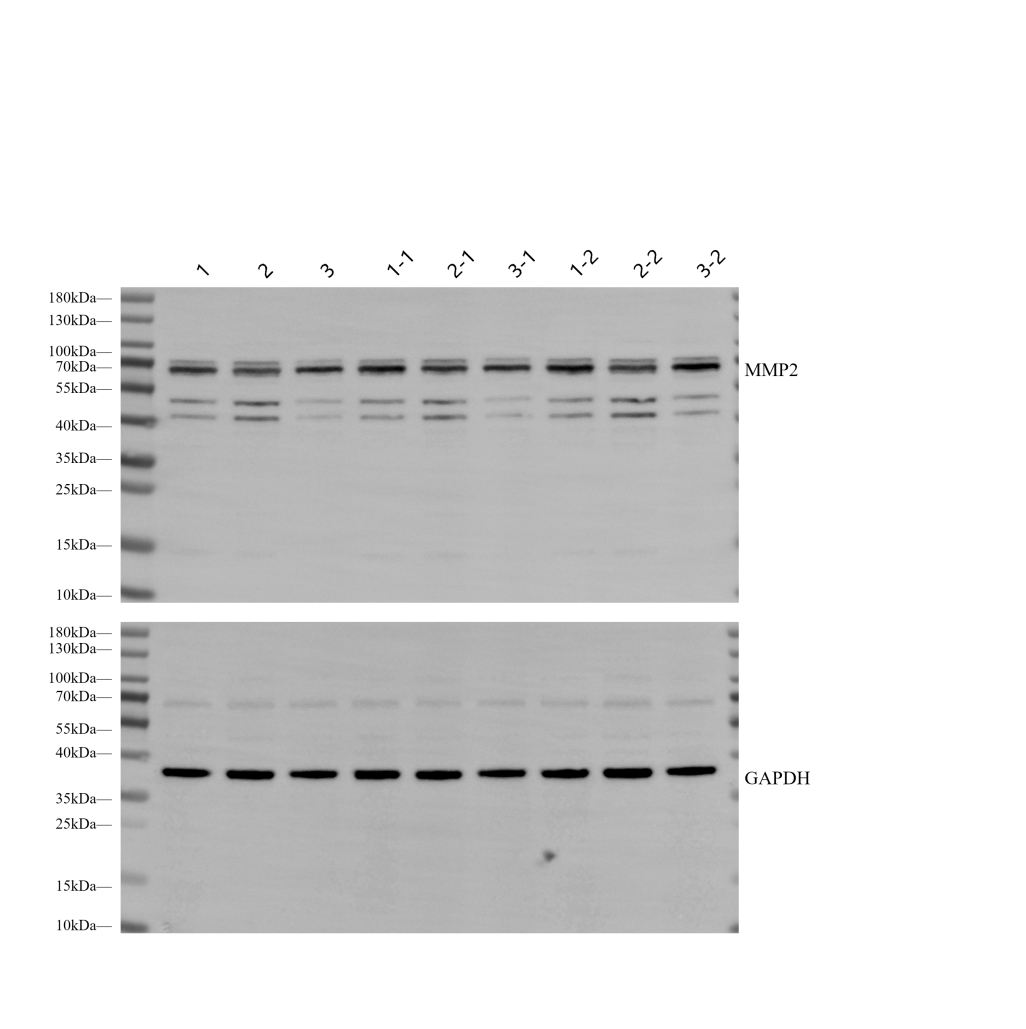


1, 1-1 and 1-2: Control; 2, 2-1and 2-2: GCK; 3, 3-1 and 3-2: GCK nanoformulation


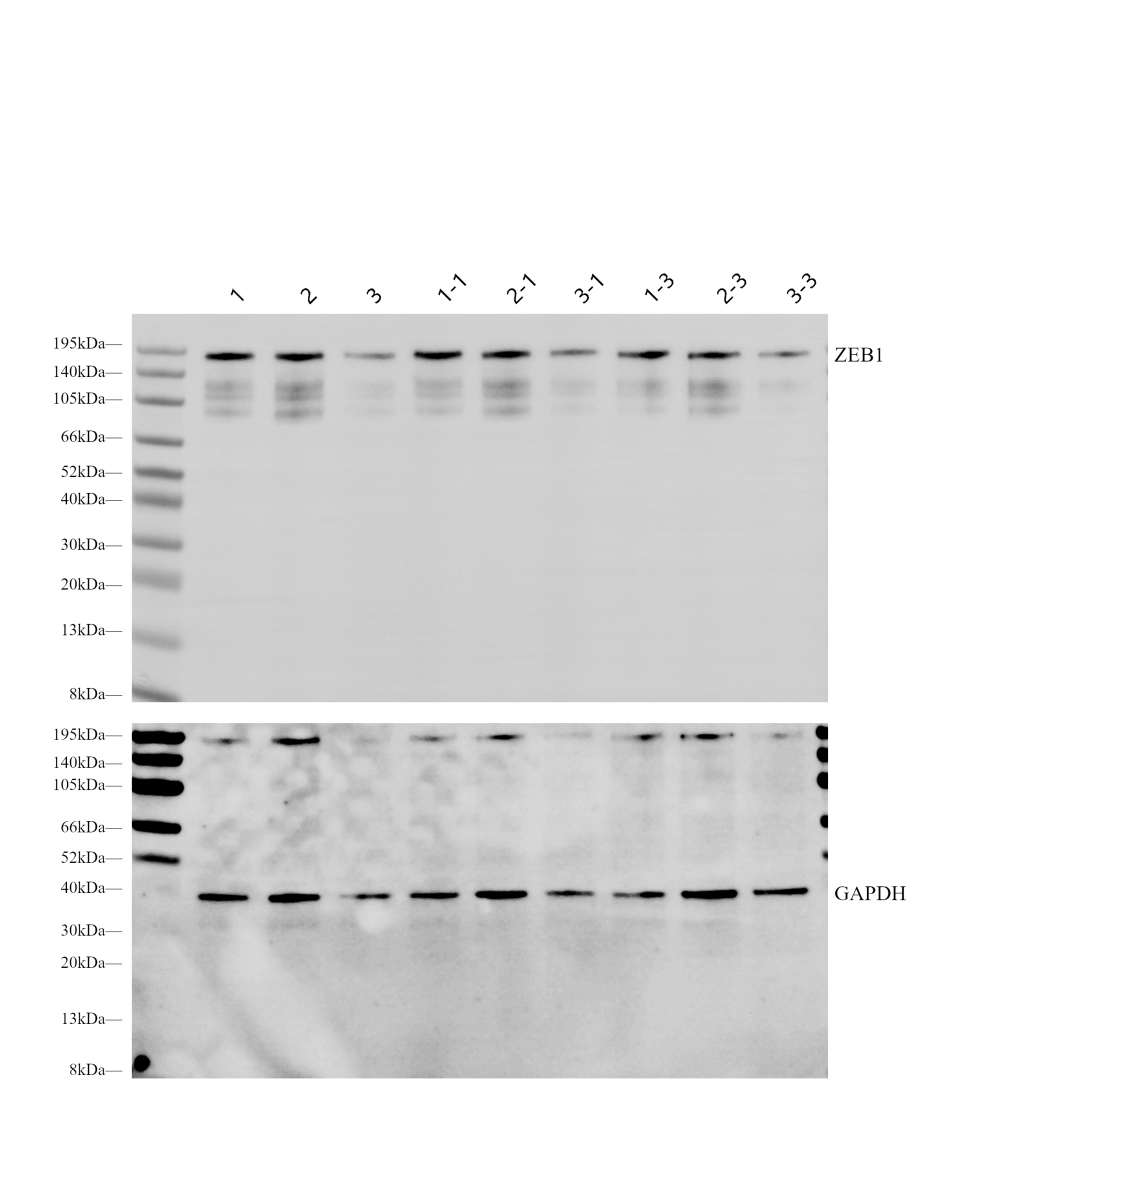


1, 1-1 and 1-3: Control; 2, 2-1and 2-3: GCK; 3, 3-1 and 3-3: GCK nanoformulation


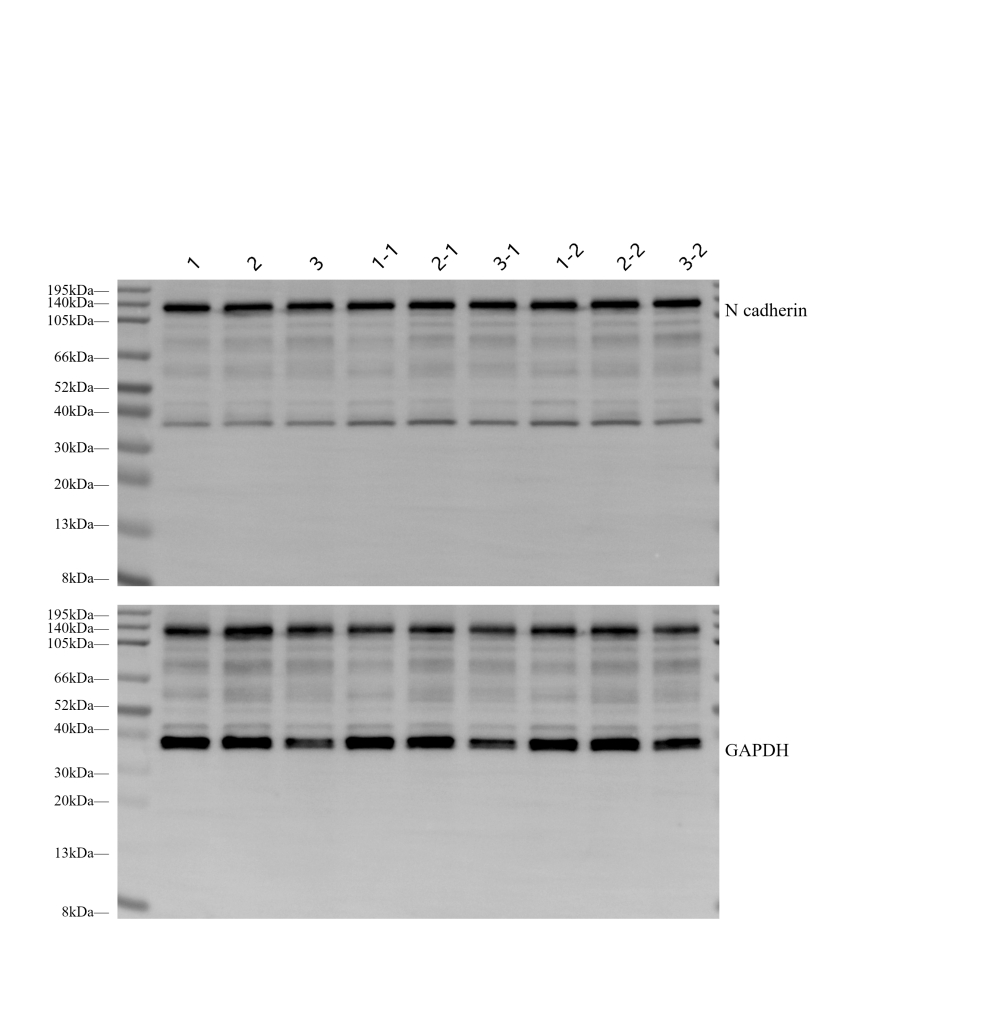


1, 1-1 and 1-2: Control; 2, 2-1 and 2-2: GCK; 3, 3-1 and 3-2: GCK nanoformulation


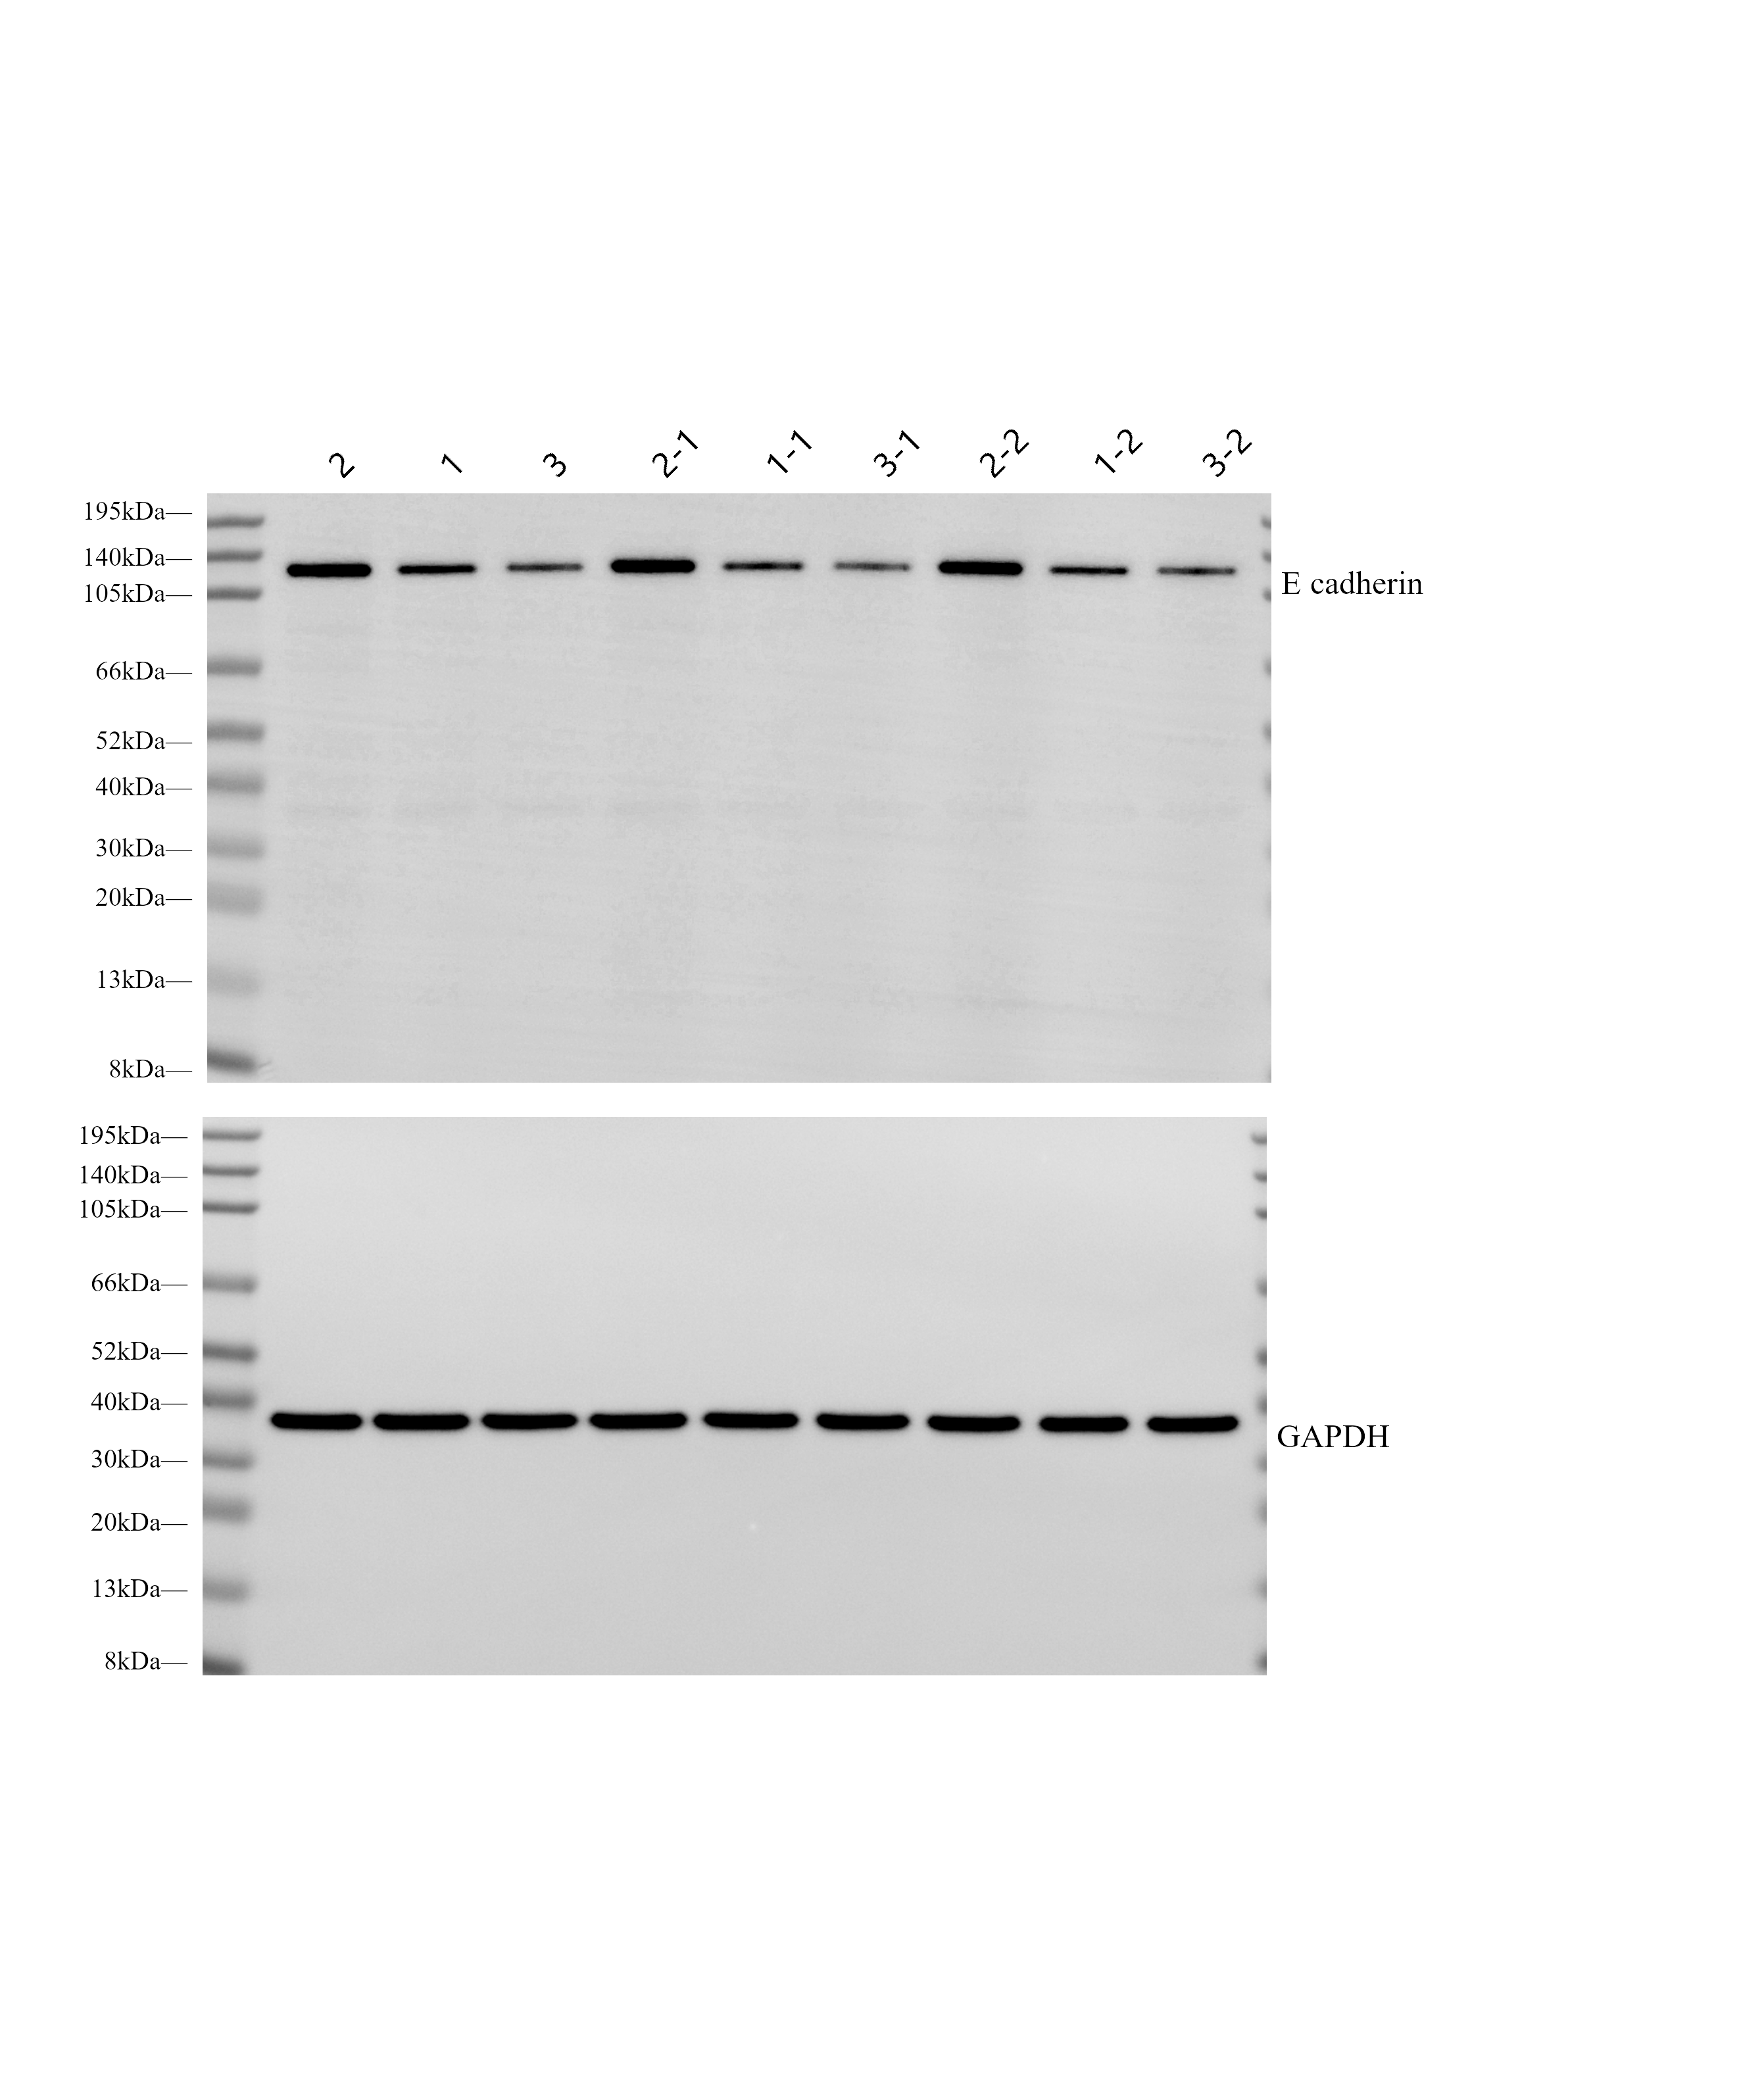


1, 1-1 and 1-2: Control; 2, 2-1 and 2-2: GCK; 3, 3-1 and 3-2: GCK nanoformulation


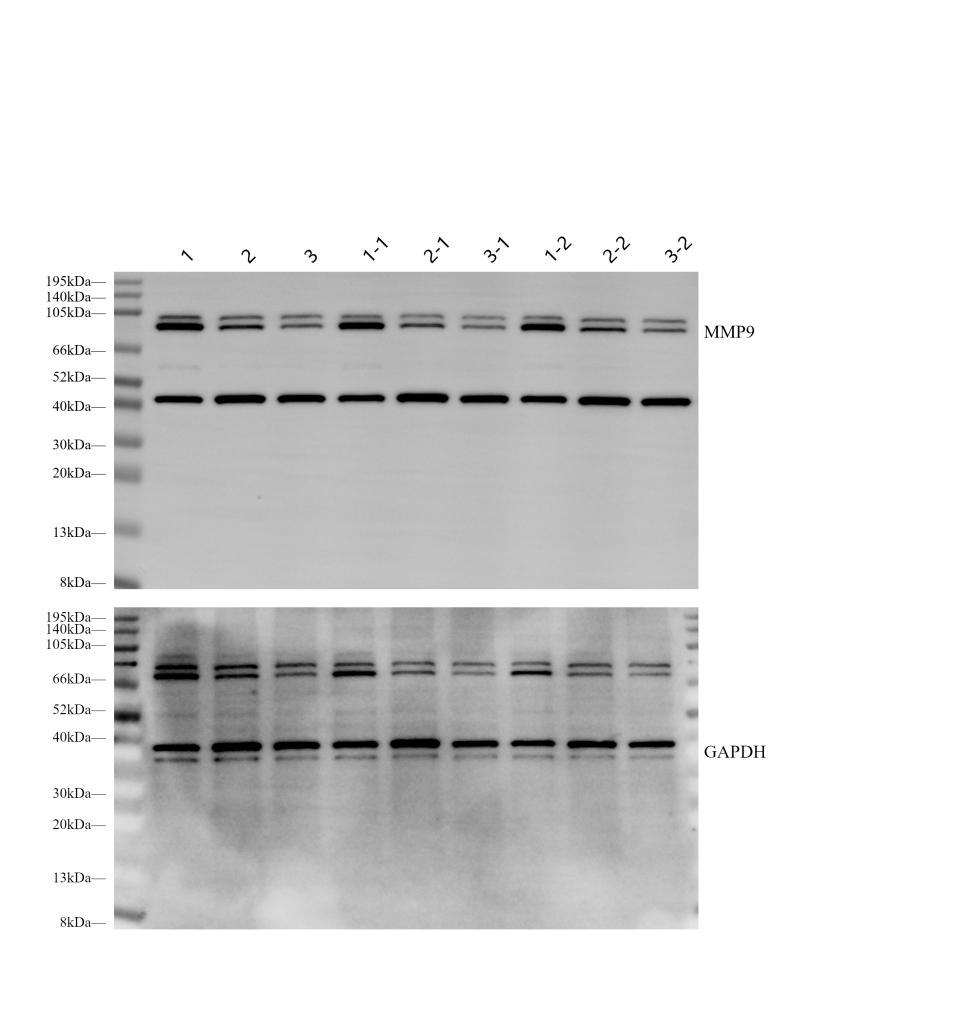


1, 1-1 and 1-2: Control; 2, 2-1 and 2-2: GCK 3, 3-1 and 3-2: GCK nanoformulation


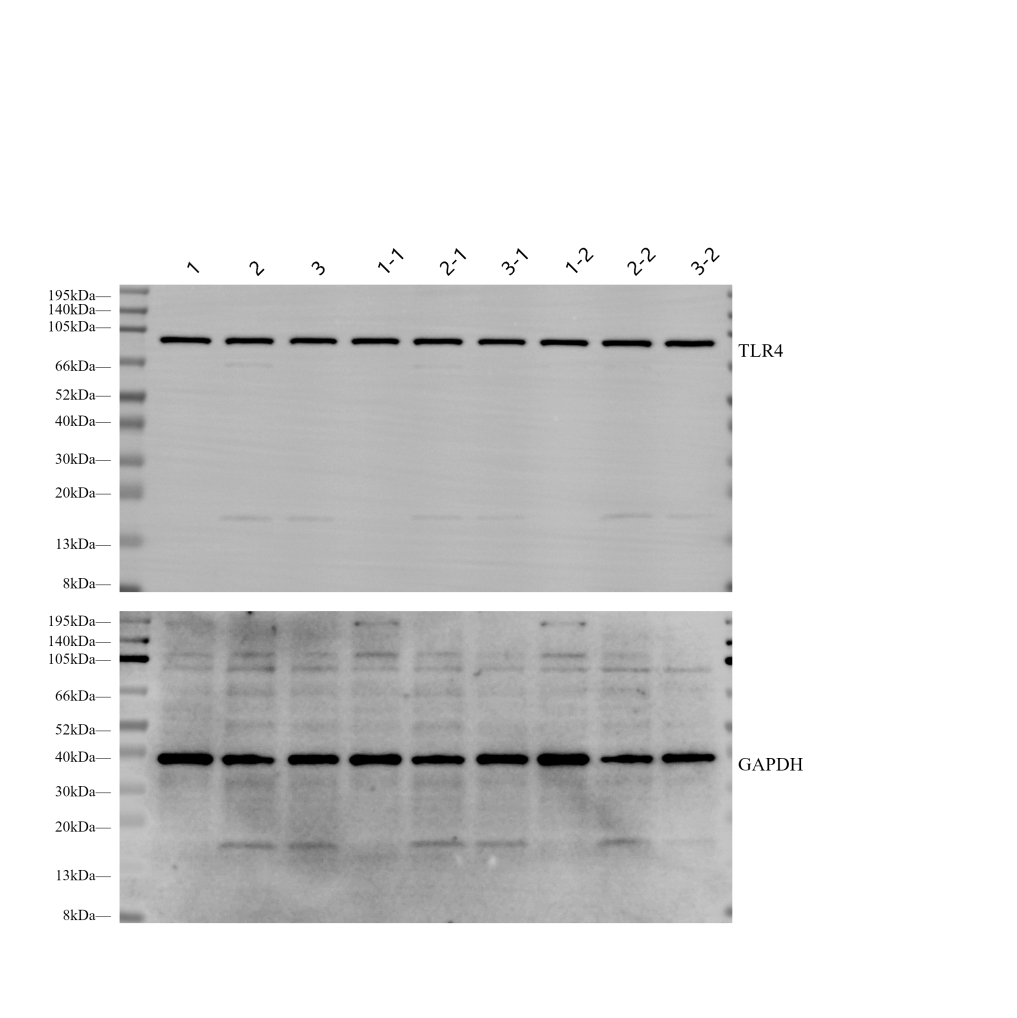


1, 1-1 and 1-2: Control; 2, 2-1 and 2-2: GCK 3, 3-1 and 3-2: GCK nanoformulation


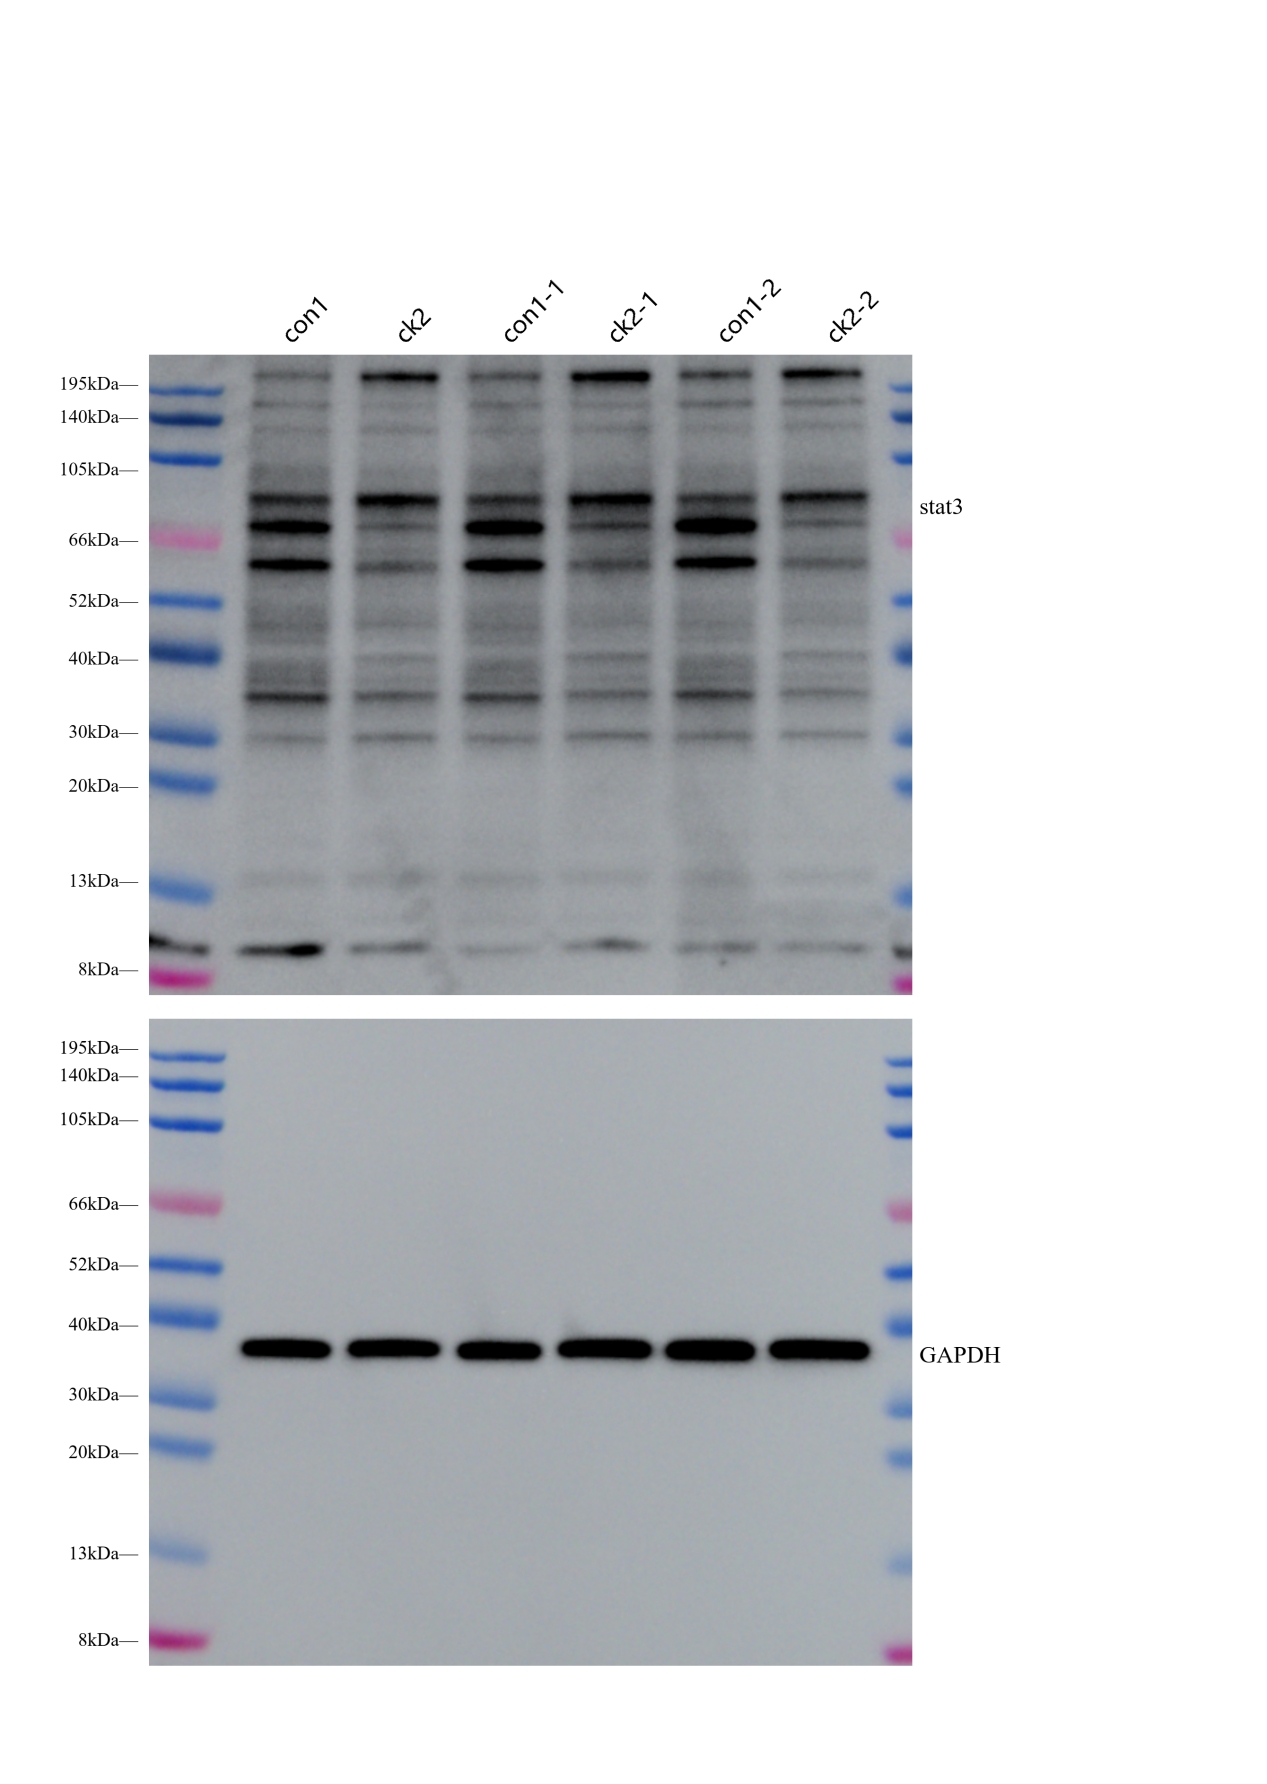


con1, con1-1 and con1-2: Control; ck2, ck2-1 and ck2-2: GCK


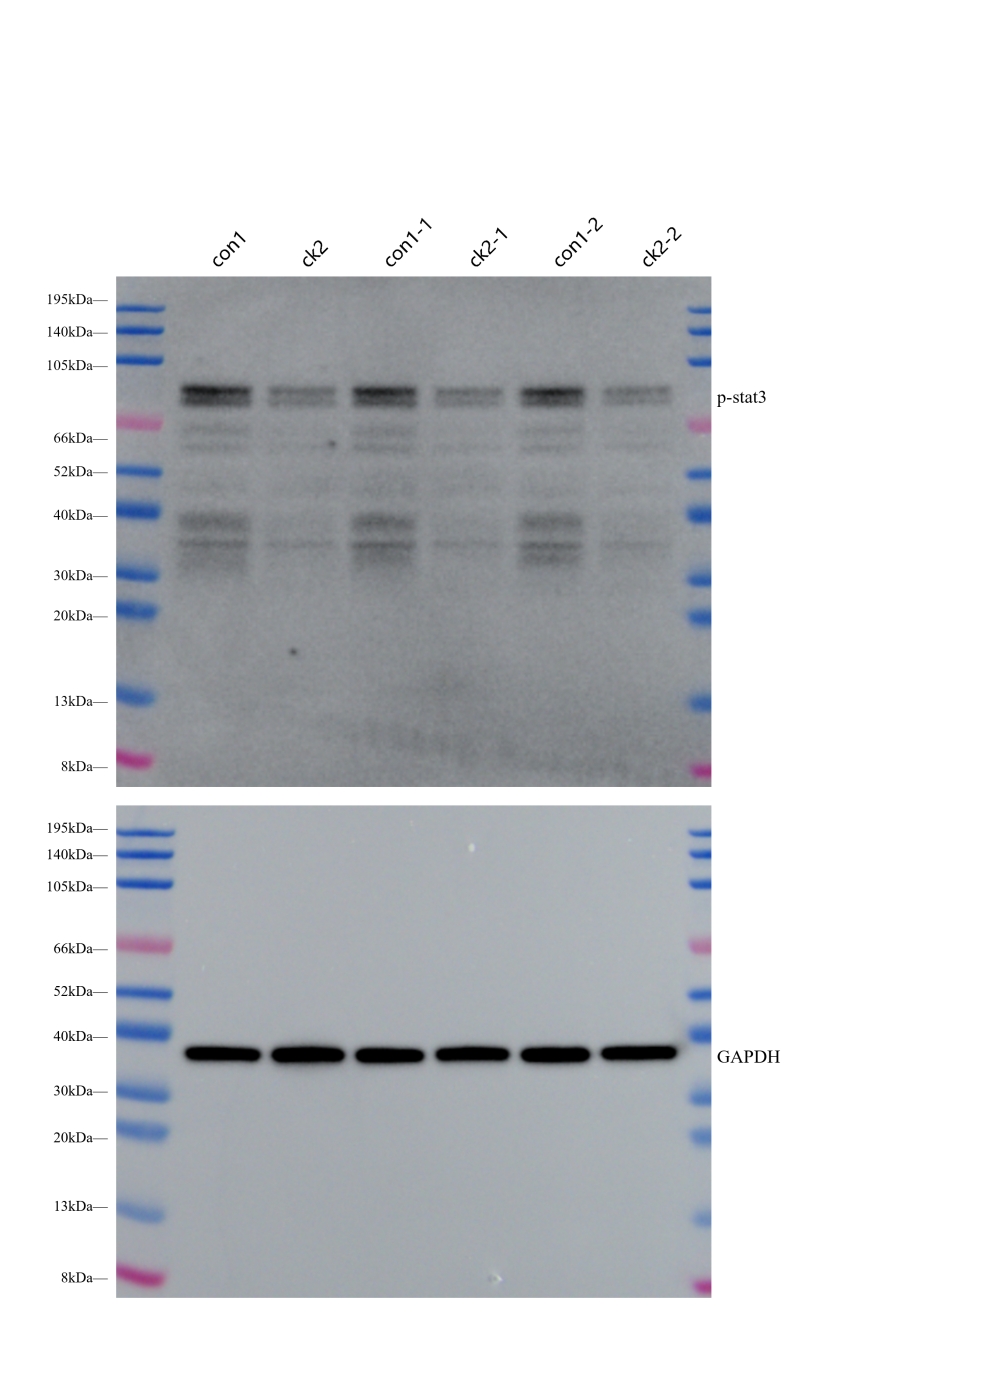


con1, con1-1 and con1-2: Control; ck2, ck2-1 and ck2-2: GCK


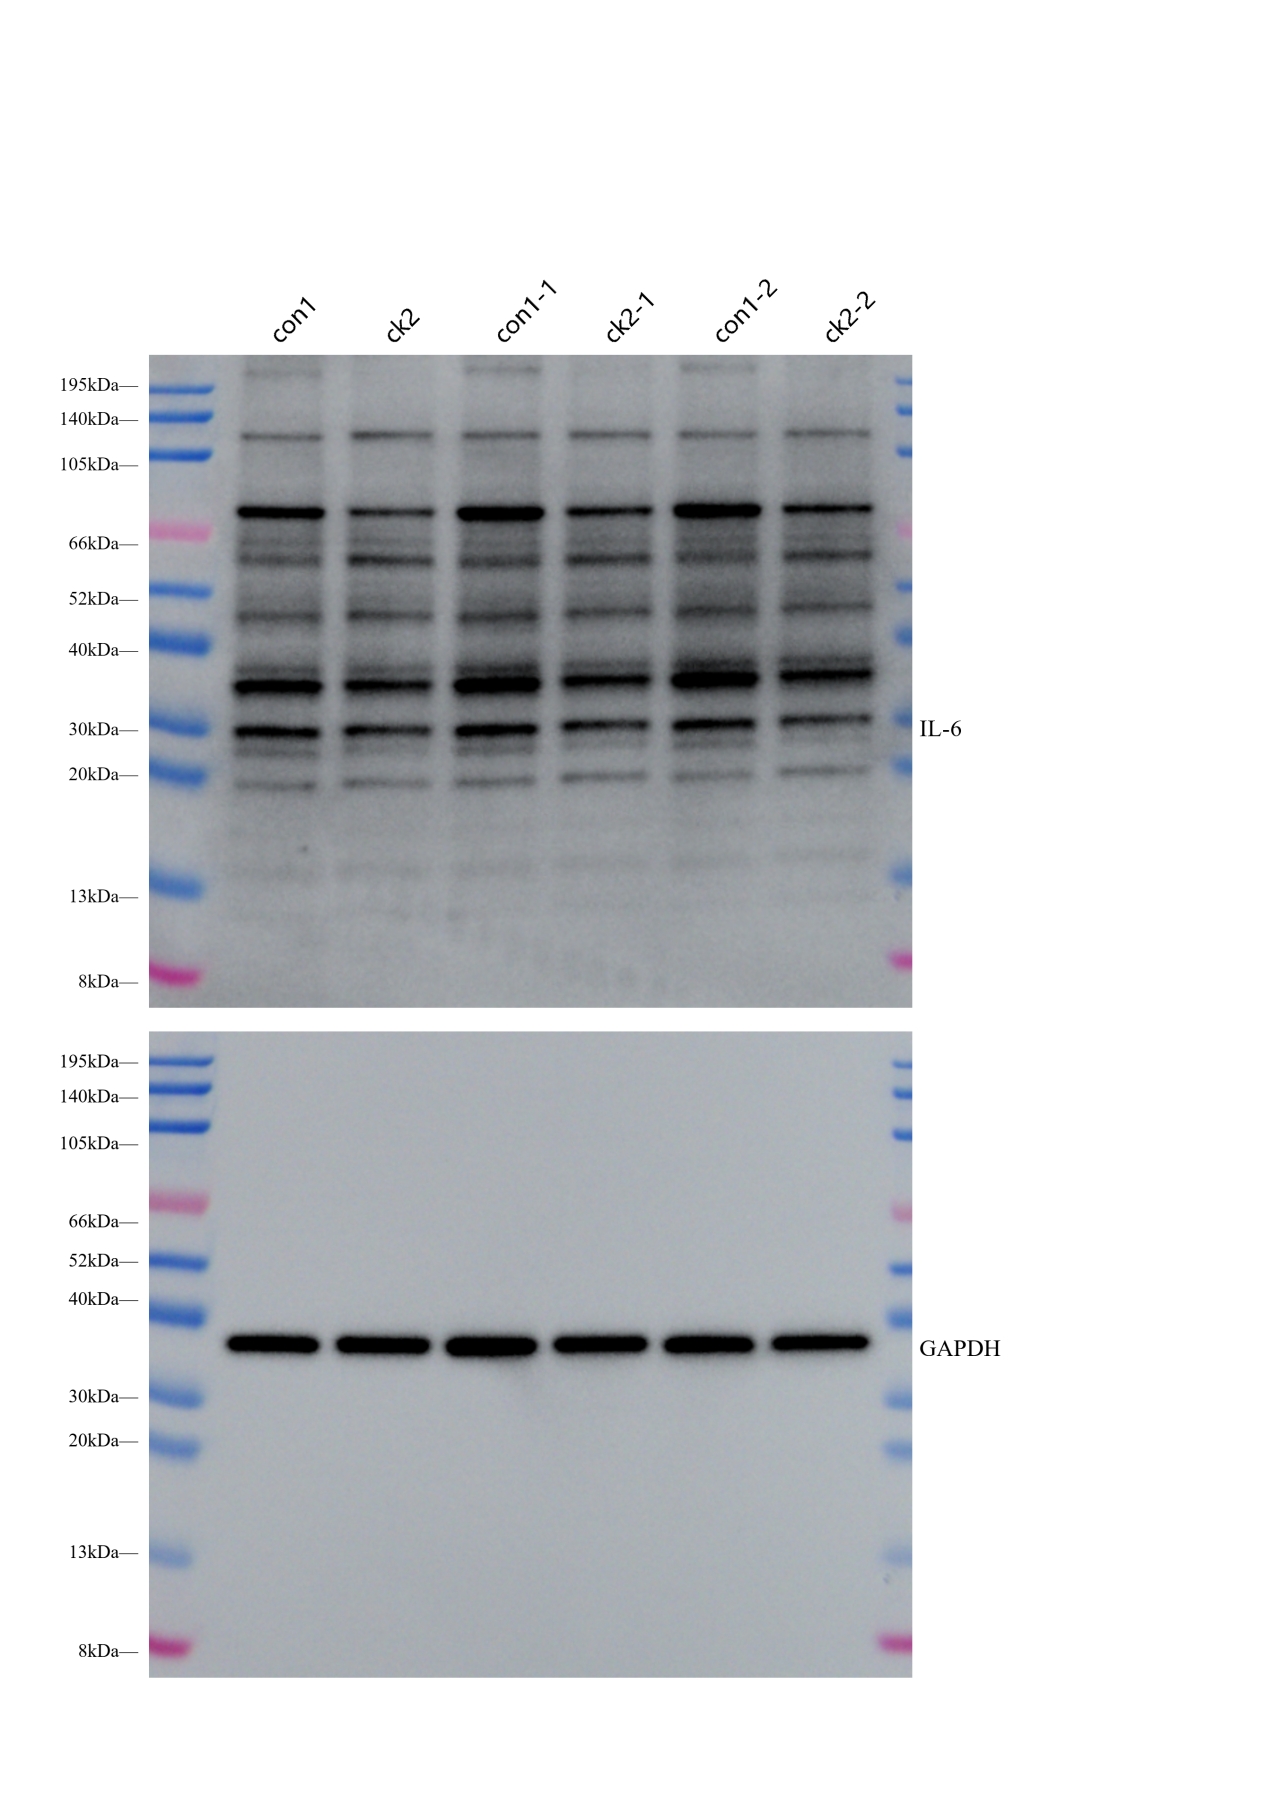


con1, con1-1 and con1-2: Control; ck2, ck2-1 and ck2-2: GCK
